# Supplementary material
Source: PubMed Central journal article supplement (PMC6612302)

Online Repository

**Supplementary Figure Legends**

**Supplementary Figure 1: Aberrant cytokine profiles of *PIK3CD* GOF memory CD4<sup>+</sup> T and cTfh cells**

(A) Naïve and total memory CD4<sup>+</sup> T cells or (B) cTfh cells were sort-purified from the peripheral blood of healthy donors and patients with *PIK3CD* GOF mutations and then cultured with beads coated with anti-CD2/CD3/CD28 mAbs. After 5 days, secretion of the indicated cytokines was determined by cytometric bead arrays. (C) CFSE-labelled naïve CD4<sup>+</sup> T cells from healthy donors or patients with *PIK3CD* GOF mutations were cultured under Th0 or Th1 polarizing conditions. After 4 days, the proportion of activated naïve CD4<sup>+</sup> T cells in each division (left panel), or expressing IL-21 (middle panel) or IFN $\gamma$  (right panel) was determined. Significant differences were determined by unpaired Students t-tests, \*\*p<0.01, \*\*\*p<0.001.

**Supplementary Figure 2: Thymic T cell development in *Pik3cd* GOF mice**

Thymi from WT and *Pik3cd* GOF intact mice aged 8-12 or 30-40 weeks were stained to identify different stages of T cell development. Percentages of double negative (DN), double positive (DP), single positive CD4<sup>+</sup> or CD8<sup>+</sup> T cell are shown in the graphs (mean  $\pm$  SEM, n=8-10).

**Supplementary Figure 3: Extrinsic factors contribute to activated phenotype of CD4<sup>+</sup> T cells activation in aged *Pik3cd* GOF mice**

Spleens from WT:WT and WT:*Pik3cd* GOF mixed bone marrow chimeras were stained to identify different CD4<sup>+</sup> T cell populations 36 weeks after reconstitution. (A) Total CD4<sup>+</sup> T cells within either CD45.1 or CD45.2 populations. Percentages of (B) naïve (CD44<sup>lo</sup>CD62L<sup>hi</sup>), (C) central memory (CD44<sup>hi</sup>CD62L<sup>hi</sup>), (D) effector memory (CD44<sup>hi</sup>CD62L<sup>lo</sup>), (E) Tfh and (F) Treg cells amongst the CD45.1<sup>+</sup>CD4<sup>+</sup> or CD45.2<sup>+</sup>CD4<sup>+</sup> T cells (mean  $\pm$  SEM, n=9-10). Significant differences were determined by 2-way ANOVA, \*\*p<0.01; \*\*\*\*p<0.0001.

**Supplementary Figure 4: *Pik3cd* GOF OT-II cells show altered activation following immunization**

WT or *Pik3cd* GOF OT-II cells were transferred to WT recipients, which were then immunized with OVA/Alum. Spleens were harvested 7 days later. (A-E) Flow cytometric analysis was performed to assess expression of surface molecules. Graphs depict mean fluorescent intensity relative to expression by recipient CD4<sup>+</sup> T cells (dotted line) of (A) CXCR5, (B) PD-1, (C) CD62L, (D) CCR7, and (E) CD127. (F-H) Cells were stimulated for 6 hours in the presence of PMA/ionomycin and cytokine production assessed by flow cytometry. Graph shows percentage of OT-II cells expressing (F) IL-2, (G) TNF $\alpha$  and (H) IL17A. All graphs show mean  $\pm$  SEM, n=15-17. Significant differences were determined by unpaired Students t-tests, \*p<0.05; \*\*\*\*p<0.0001.

**Table 1: Demographics of individuals diagnosed with *PIK3CD* GOF mutations**

| <i>PIK3CD</i> Patient | Mutation           | Age | Gender | Ethnicity          | EBV (serology or PCR) | CD4+ T cell count (x10 <sup>9</sup> /L) <sup>a</sup> | Ig levels                                   | Th2-type disease                                      | Ab responses                             | Respiratory infections/ complications              |
|-----------------------|--------------------|-----|--------|--------------------|-----------------------|------------------------------------------------------|---------------------------------------------|-------------------------------------------------------|------------------------------------------|----------------------------------------------------|
| 1                     | c.3061G>A p.E1021K | 15  | F      | Caucasian          | IgM, IgG+             | 0.14 (L)                                             | ↑IgG, Normal IgM, IgA;                      | Asthma                                                | ↓Pneumo, Hib response                    | Bronchiecstasis                                    |
| 2                     | c.3061G>A p.E1021K | 47  | M      | Caucasian          | -                     |                                                      | On IVIg                                     | -                                                     | ND (on IVIg)                             | Bronchiecstasis                                    |
| 3                     | c.3061G>A p.E1021K | 17  | F      | Caucasian          | -                     |                                                      | ↑IgM, normal IgG, IgA                       | Asthma                                                | ↓Pneumo, Hib response                    | Bronchiecstasis                                    |
| 4                     | c.3061G>A p.E1021K | 10  | F      | Caucasian          | -                     |                                                      | Normal                                      | Asthma                                                | ↓Pneumo; normal Hib and tetanus response | Pneumonia                                          |
| 5                     | c.3061G>A p.E1021K | 12  | F      | Caucasian          | +                     | 0.5                                                  | Normal (↑IgM during EBV infection)          | Eosinophilic esophagitis, eczema                      | ↓Pneumo response                         | Yes                                                |
| 6                     | c.3061G>A p.E1021K | 20  | F      | Caucasian          | -                     | 0.51                                                 | ↑IgM, ↓IgG, ↓IgA; IgE <sup>b</sup> : 2 U/ml | Asthma                                                | ↓Pneumo response                         | Recurrent pneumonia, bronchiecstasis               |
| 7                     | c.3061G>A p.E1021K | 9   | F      | Polynesian         | ++                    | 0.42                                                 | ↑IgM, ↑IgG, normal IgA; IgE: 83U/mL         | -                                                     | ↓Pneumo response                         | Recurrent pneumonia, bronchiecstasis               |
| 8                     | c.3061G>A p.E1021K | 12  | M      | Lebanese Caucasian | -                     | 0.54                                                 | ↑IgM, ↓IgG; IgE: normal                     | -                                                     | ND                                       | Bronchiecstasis                                    |
| 9                     | c.3061G>A p.E1021K | 7   |        |                    |                       |                                                      |                                             | -                                                     |                                          |                                                    |
| 10                    | c.3061G>A p.E1021K | 10  | M      | Caucasian          | -                     | 0.26 (L)                                             | IgM, G, A, E: Normal                        | -                                                     | Intact                                   |                                                    |
| 11                    | c.3061G>A p.E1021K | 15  | F      | European           | -                     | 0.23-0.38 (L)                                        | ↑IgM, hypogamma; IgE: normal                | -                                                     | ↓Pneumovax response                      | Recurrent pneumonia                                |
| 12                    | c.3061G>A p.E1021K | 11  | M      | Moroccan           | ++                    | 0.57                                                 | ↑IgM, hypogamma; IgE: normal                | Urticarial, allergic rhinoconjunctivitis, mild eczema | Weak/absent                              | Recurrent pneumonia                                |
| 13                    | c.3061G>A p.E1021K | 6   | M      | Caucasian          | -                     | 0.34 (L)                                             | ↑IgM ↓IgG, normal IgA; IgE: 12U/mL          | -                                                     | ND (on IVIg)                             | Otitis media, Recurrent pneumonia, bronchiecstasis |
| 14                    | c.3061G>A p.E1021K | 10  | F      | Caucasian          | ++                    | 0.19-0.39 (L)                                        | ↑IgM, normal IgG and IgA;                   | -                                                     | ↓Pneumo response; normal                 | Bronchiecstasis                                    |

|    |                       |    |   |                                         |    |                  |                                          |                                                         |                                                         |                                                           |
|----|-----------------------|----|---|-----------------------------------------|----|------------------|------------------------------------------|---------------------------------------------------------|---------------------------------------------------------|-----------------------------------------------------------|
|    |                       |    |   |                                         |    |                  | IgE: 3 U/mL                              |                                                         | tetanus                                                 |                                                           |
| 15 | c.3061G>A<br>p.E1021K | 19 | F | Caucasian                               | -  | 0.41             | ↑IgM, ↓IgG,<br>□□□IgA                    | -                                                       | ↓Pneumo<br>response                                     | Pneumonia, ear<br>infections                              |
| 16 | c.3061G>A<br>p.E1021K | 46 | F | Caucasian                               | -  | 0.62             | Normal                                   | -                                                       | ↓Pneumo<br>response                                     | Recurrent<br>conjunctivitis, sinusitis,<br>ear infections |
| 17 | c.3061G>A<br>p.E1021K | 12 | M | Caucasian                               | -  | 0.5              | ↑IgM, ↓IgG,<br>↓IgA                      | -                                                       | ↓Pneumo, Hib<br>response                                | Pneumonia,<br>conjunctivitis, ear<br>infections           |
| 18 | c.3061G>A<br>p.E1021K | 8  | F | Cauc,<br>Persian<br>Sth Amer<br>descent | +  | 0.34 (L)         | ↑IgM,<br>hypogamma;<br>IgE: 2U/mL        | -                                                       | ↓□□□□□□□□<br>response, normal<br>diphtheria<br>response | Yes                                                       |
| 19 | c.3061G>A<br>p.E1021K | 10 | M | Cauc,<br>Persian<br>Sth Amer<br>descent | +  | 0.72             | Normal;<br>IgE: 8U/mL                    | -                                                       | ↓□□□□□□□□<br>response, normal<br>diphtheria<br>response | Yes                                                       |
| 20 | c.3061G>A<br>p.E1021K | 12 | M | Caucasian,<br>American<br>descent       | -  | 0.24-0.38<br>(L) | ↑IgM, normal<br>IgG; IgE:<br><1U/mL      | Atopic dermatitis,<br>eczema                            | ND (on IVIg)                                            |                                                           |
| 21 | c.3061G>A<br>p.E1021K | 19 | F | Hispanic                                | +  | 0.2 (L)          | ↑IgM,<br>hypogamma;<br>IgE: 6U/mL        | -                                                       | ND (on IVIg)                                            |                                                           |
| 22 | c.1573G>A<br>p.E525K  | 60 | M | Caucasian,<br>American<br>descent       | +  | 0.71             | Normal;<br>IgE: 160 U/mL<br>(H)          | Eosinophilic<br>esophagitis,<br>eczema, food<br>allergy | ↓□□□□□□□□<br>response, normal<br>diphtheria<br>response |                                                           |
| 23 | c.1573G>A<br>p.E525K  | 28 | M | Caucasian,<br>American<br>descent       | +  | 0.74             | Normal;<br>IgE: 41U/mL                   | Eosinophilic<br>esophagitis,<br>eczema                  | ↓□□□□□□□□<br>response, normal<br>diphtheria<br>response |                                                           |
| 24 | c.1573G>A<br>p.E525K  | 22 | F | Caucasian,<br>American<br>descent       | ++ | 1.36             | ↑IgM, normal<br>IgG; IgE:<br>26U/mL      | Eosinophilic<br>esophagitis,<br>eczema, hives           | ↓□□□□□□□□<br>response, normal<br>diphtheria<br>response |                                                           |
| 25 | c.3061G>A<br>p.E1021K | 15 | M | Caucasian,<br>American<br>descent       | -  | 0.19 (L)         | ↑IgM,<br>hypogamma;<br>IgE: <1U/mL       | -                                                       | ND (on IVIg)                                            |                                                           |
| 26 | c.3061G>A<br>p.E1021K | 22 | M | Caucasian,<br>American<br>descent       | +  | 0.27 (L)         | □□rm□□□□gM,<br>hypogamma;<br>IgE: 24U/mL | Asthma                                                  | ↓□□□□□□□□<br>response, normal<br>diphtheria<br>response |                                                           |

|    |                       |    |   |                                   |    |          |                                                   |                             |                                                         |  |
|----|-----------------------|----|---|-----------------------------------|----|----------|---------------------------------------------------|-----------------------------|---------------------------------------------------------|--|
| 27 | c.3061G>A<br>p.E1021K | 16 | M | Caucasian,<br>American<br>descent | -  | 0.32 (L) | ↑IgM,<br>hypogamma;<br>IgE: <1U/mL                | -                           | ↓□□□□□□□□<br>response, normal<br>diphtheria<br>response |  |
| 28 | c.1573G>A<br>p.E525K  | 12 | F | Asian                             | ++ | 0.35 (L) | □□rm□□□□gM,<br>hypogamma;<br>IgE: 450 U/mL<br>(H) | Asthma                      | ↓□□□□□□□□<br>response, normal<br>diphtheria<br>response |  |
| 29 | c.371G>A<br>p.G124D   | 40 | F |                                   | +  |          |                                                   |                             |                                                         |  |
| 30 | c.3061G>A<br>p.E1021K | 29 | F |                                   |    |          |                                                   |                             |                                                         |  |
| 31 | c.3061G>A<br>p.E1021K | 16 | M |                                   |    |          |                                                   |                             |                                                         |  |
| 32 | c.3061G>A<br>p.E1021K | 23 | F |                                   |    |          |                                                   | Eosinophilic<br>esophagitis |                                                         |  |
| 33 | c.1573G>A<br>p.E525K  | 65 | F |                                   | +  |          |                                                   |                             |                                                         |  |
| 34 | c.1573G>A<br>p.E525K  | 15 | M |                                   |    |          |                                                   | Eosinophilic<br>esophagitis |                                                         |  |
| 35 | c.3061G>A<br>p.E1021K | 10 | M |                                   |    |          |                                                   |                             |                                                         |  |
| 36 | c.1002C>A,<br>p.N334K | 12 | F |                                   |    |          |                                                   |                             |                                                         |  |
| 37 | c.1573G>A<br>p.E525K  | 13 | F |                                   |    |          |                                                   |                             |                                                         |  |

<sup>a</sup>Normal range: 0.4-2 x 10<sup>9</sup>/L

<sup>b</sup>IgE normal range: 0-90 U/mL

ND – Not done; IVIG – intravenous immunoglobulin

# Supp Figure 1

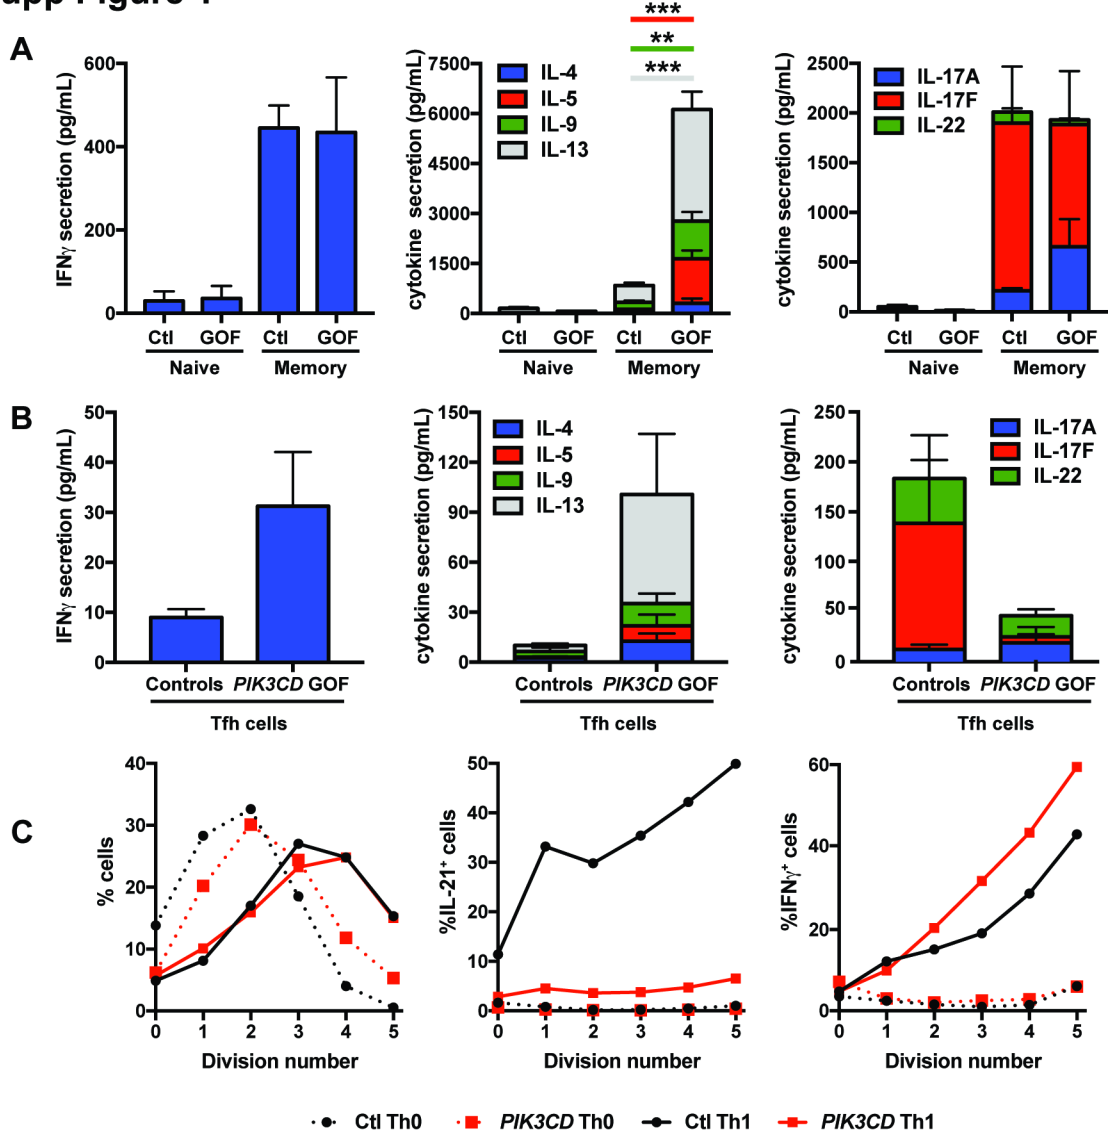

Supp Figure 2

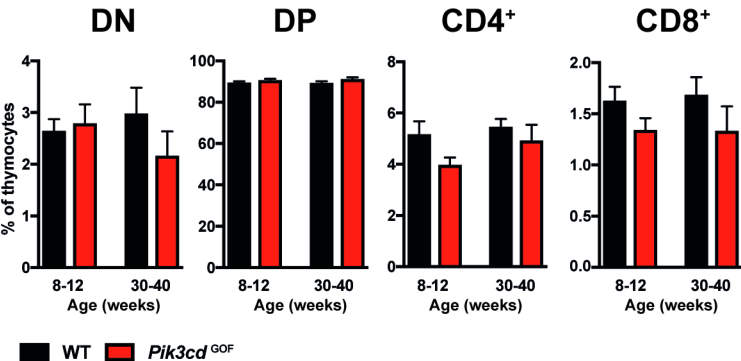

Supp Figure 3

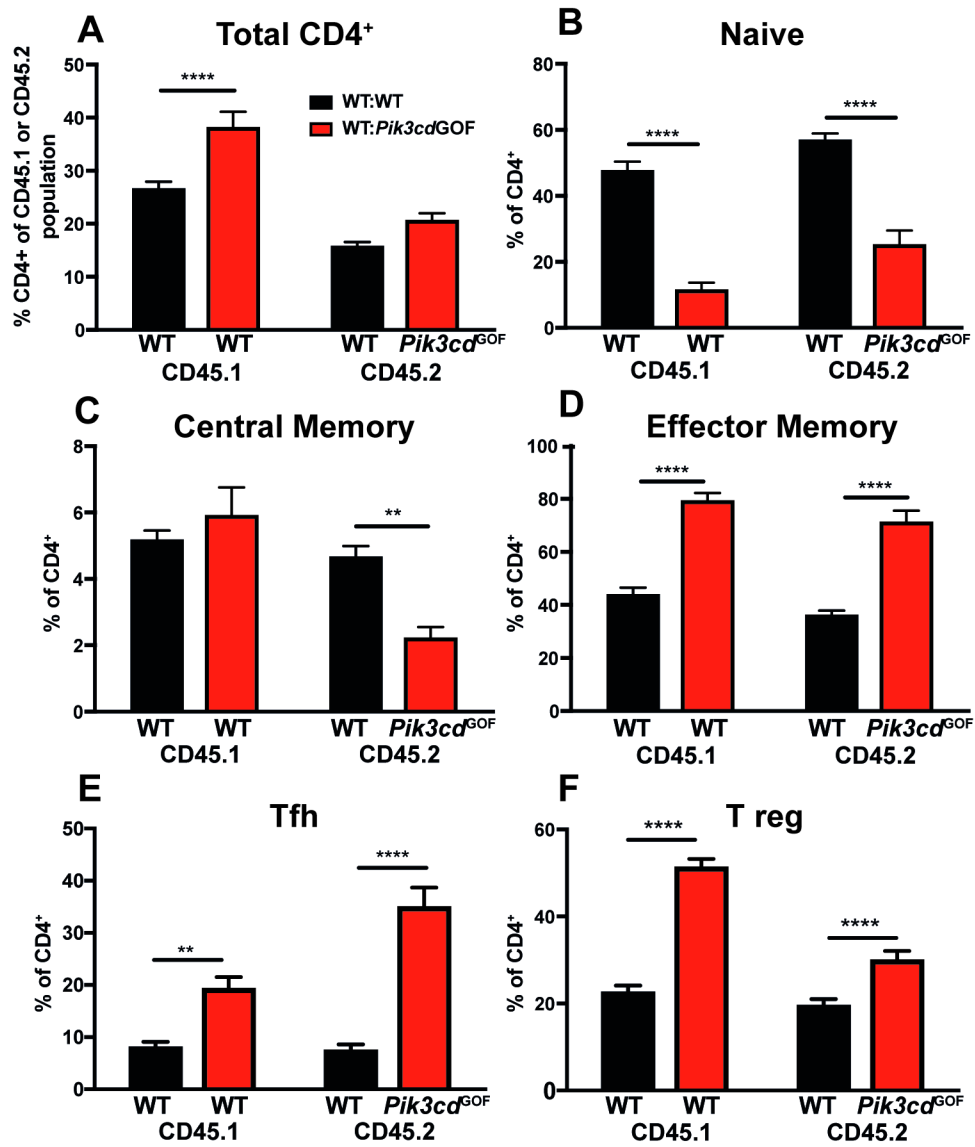

Supp Figure 4

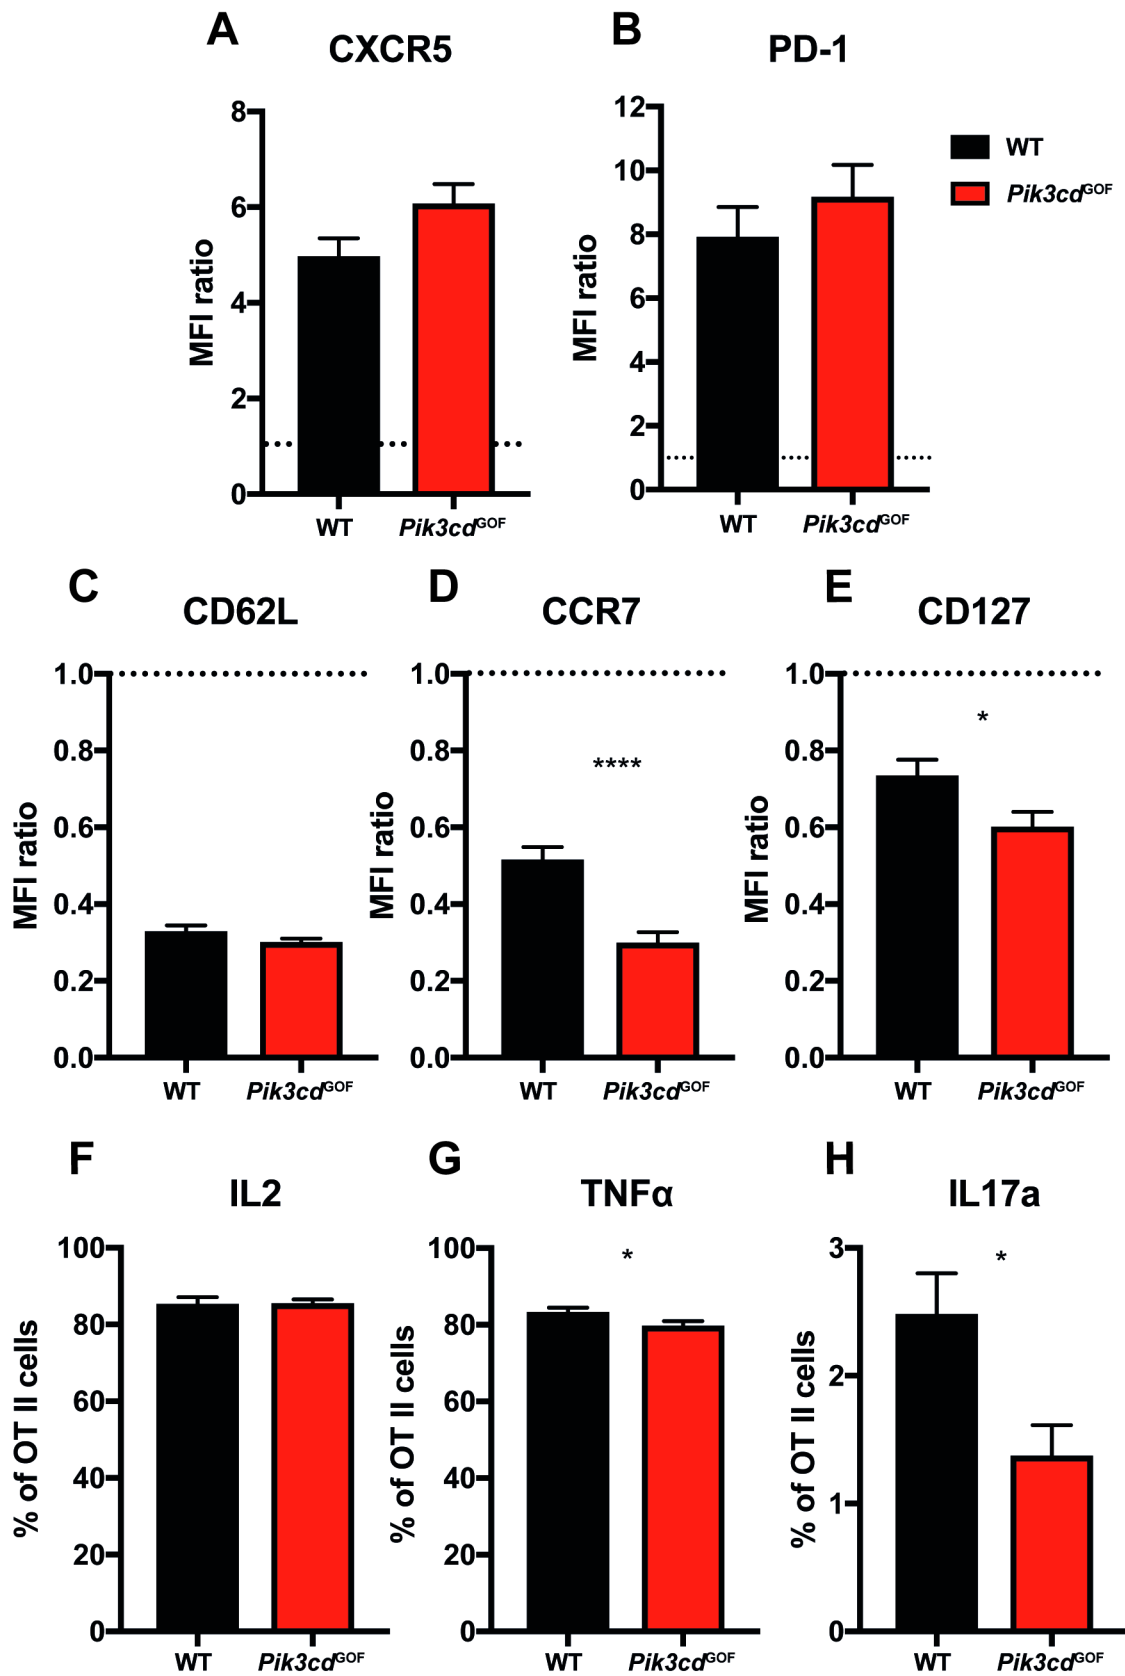

Supplement: NIHMS1520992-supplement-1.pdf [file NIHMS1520992-supplement-1.pdf]
